# Supplementary material
Source: publisher figshare collection journal article supplement (https://frontiersin.figshare.com/ndownloader/files/15052979)
Supplement: Supplementary file [file 15052979]

## Supplementary Figures

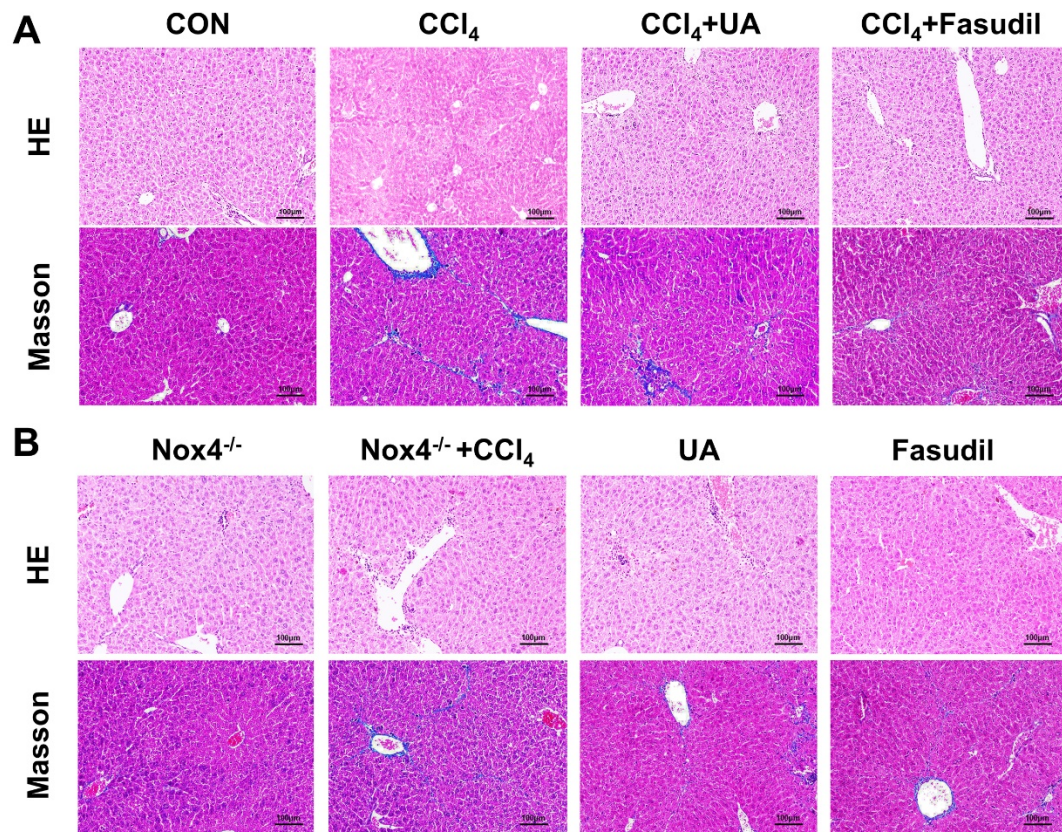

Supplementary Figure 1. (A). HE & Masson staining of liver tissues from each group of wild-type mice. (B). HE & Masson staining of tissues from each group of NOX4<sup>-/-</sup> mice. Original magnification,  $\times 100$ .

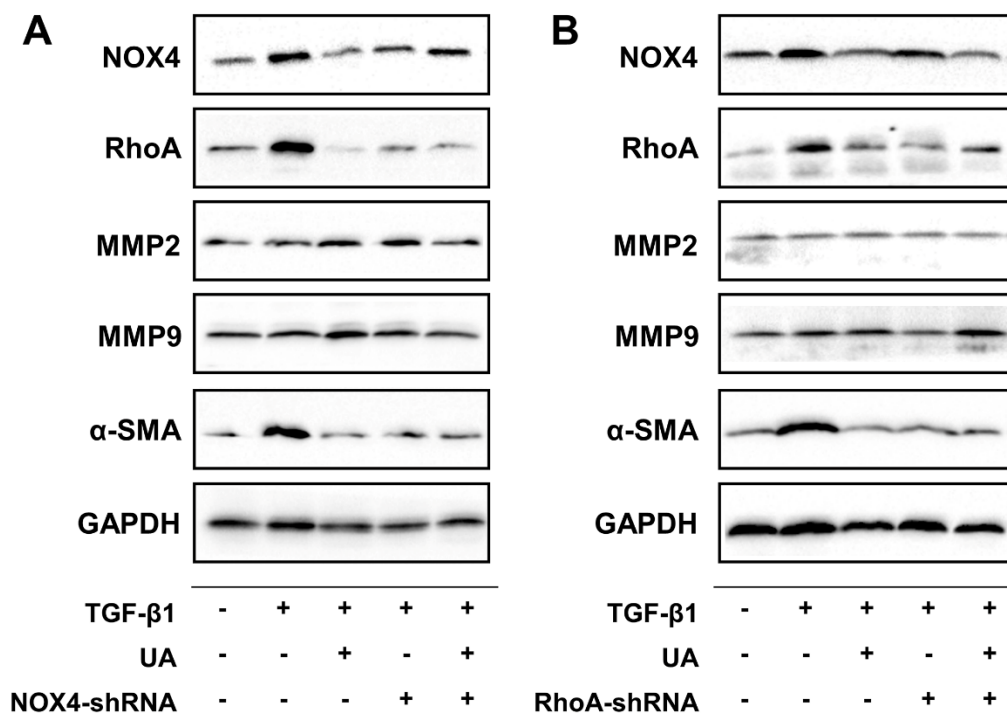

Supplementary Figure 2. (A). Western blot analysis of NOX4-shRNA with or without UA intervention under the stimulation of TGF- $\beta$ 1-induced HSC activation. (B). Western blot analysis of NOX4-shRNA with or without UA intervention under the stimulus of TGF- $\beta$ 1-induced HSC activation.

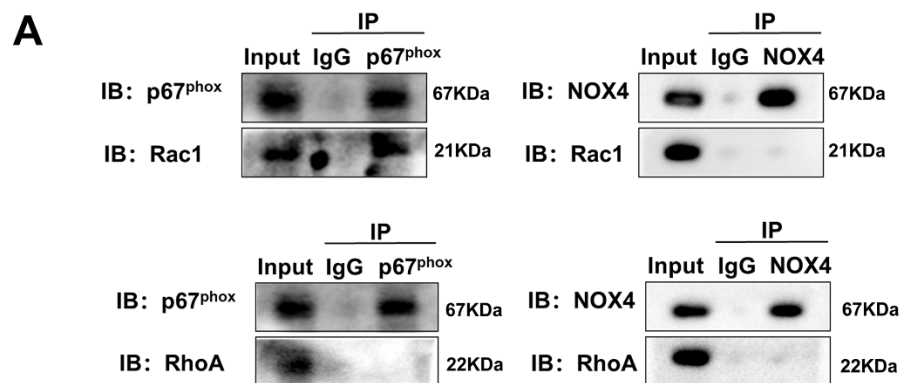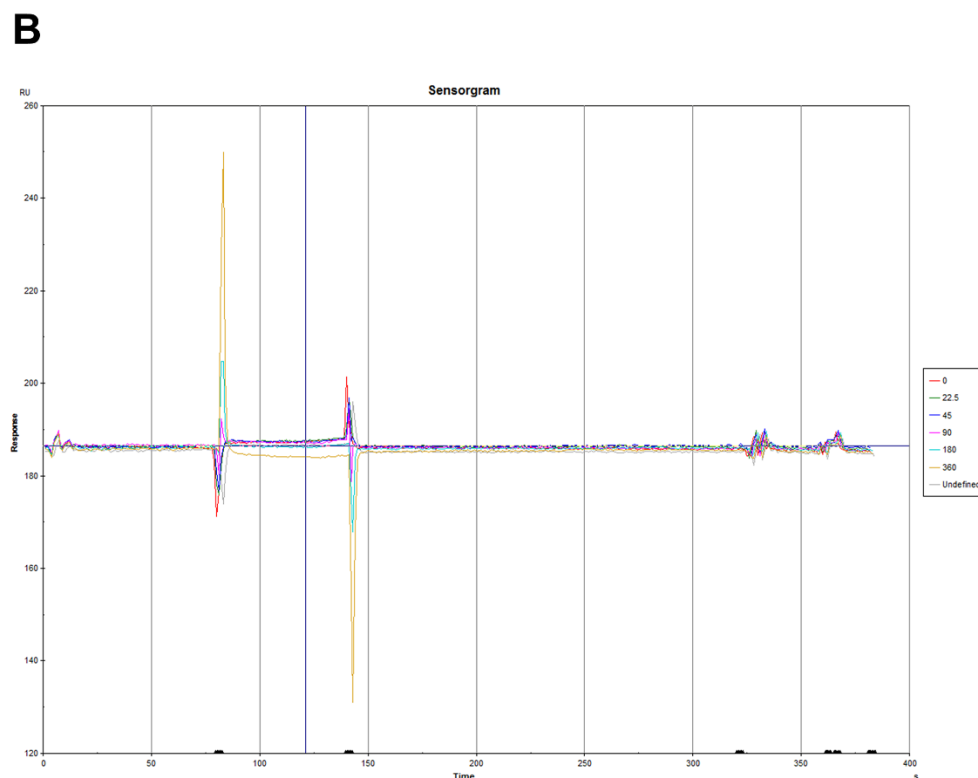

Supplementary Figure 3. (A). Coimmunoprecipitation analysis of different proteins. (B). Binding dissociation curve between the NOX4 and RhoA proteins generated using the Biacore protein interaction analysis system. The anti-NOX4 antibody was bound to the CM5 chip, and the full-length recombinant NOX4 protein was bound to the antibody. RhoA was diluted to 0  $\mu$ g/mL, 22.5  $\mu$ g/mL, 45  $\mu$ g/mL, 90  $\mu$ g/mL, 180  $\mu$ g/mL, 360  $\mu$ g/mL with a buffer and loaded to observe its binding activity.
